# Supplementary material
Source: ML conference proceedings conference paper supplement (https://proceedings.neurips.cc/paper_files/paper/2022/hash/11715d433f6f8b9106baae0df023deb3-Abstract.html)
Supplement: Supplementary file 1 [file 11715d433f6f8b9106baae0df023deb3-Supplemental-Conference.zip]

Archive with 2 entries (1 files):
- supplementary/
- supplementary/Neurips22_planning_appendix.pdf
